# Supplementary material for: Integrative proteomic and transcriptomic analysis provides evidence for TrkB (NTRK2) as a therapeutic target in combination with tyrosine kinase inhibitors for non-small cell lung cancer
Source: PubMed Central journal article supplement (PMC5865668; doi:10.18632/oncotarget.24361), 2018-01-30
Supplement: oncotarget-09-14268-s001.pdf [file oncotarget-09-14268-s001.pdf]

# Integrative proteomic and transcriptomic analysis provides evidence for TrkB (NTRK2) as a therapeutic target in combination with tyrosine kinase inhibitors for non-small cell lung cancer

## SUPPLEMENTARY MATERIALS

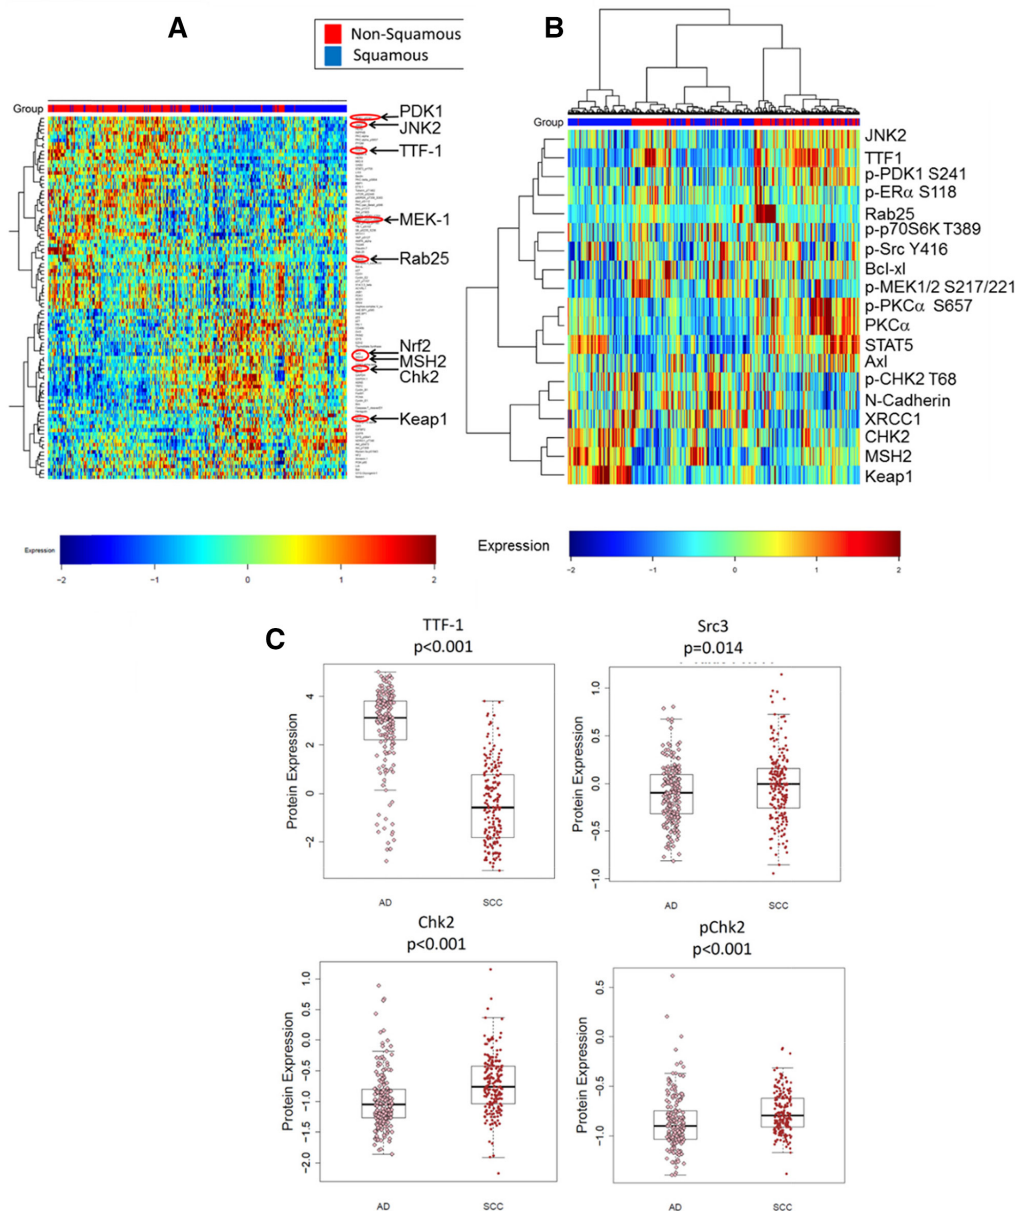

**Supplementary Figure 1: TCGA validation of PROSPECT findings.** (A) Hierarchical clustering heat map with 100 proteins that achieved the highest level of significance, with some key proteins highlighted, (B) Heat map of protein levels by histology of top 29 hits in Figure 1A that were also tested in TCGA. Several proteins demonstrated the same variations by histology in both datasets, including JNK2, TTF-1, PDK1, and Rab25. (C) TCGA validation demonstrates increased levels of Src3, Chk2, and pChk2 in SCC tumors, concordant with the findings in the PROSPECT database.

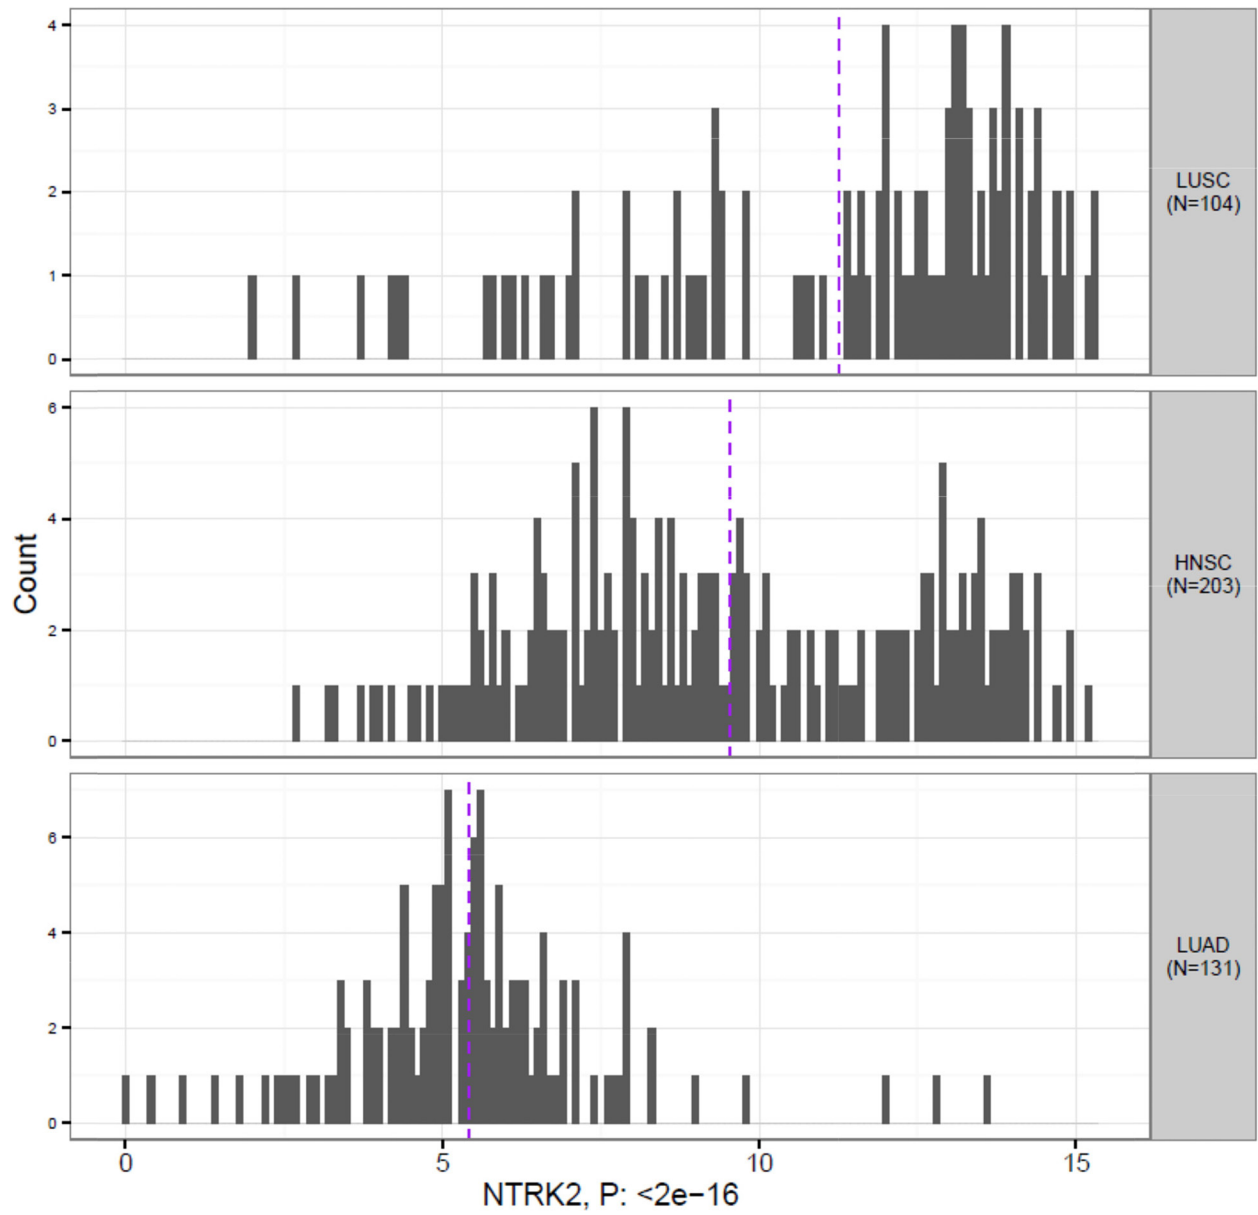

**Supplementary Figure 2: Probe analysis demonstrating that expression profiles were more similar between lung and head/neck SCC than with adenocarcinoma and lung SCC.**

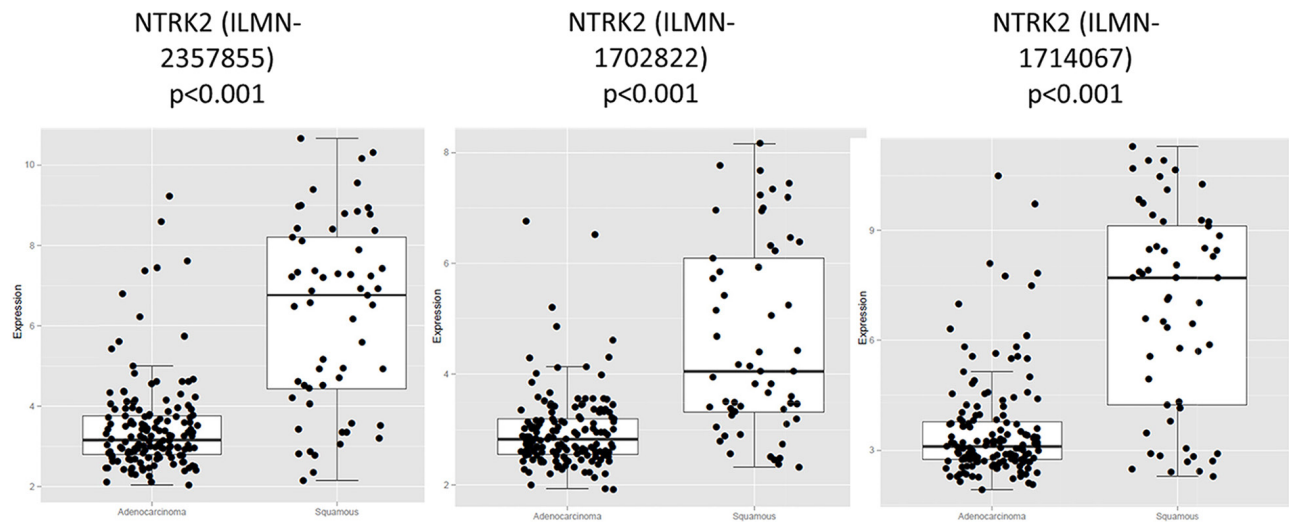

Supplementary Figure 3: Variations in *NTRK2* expression by histology with all probes used in this analysis.

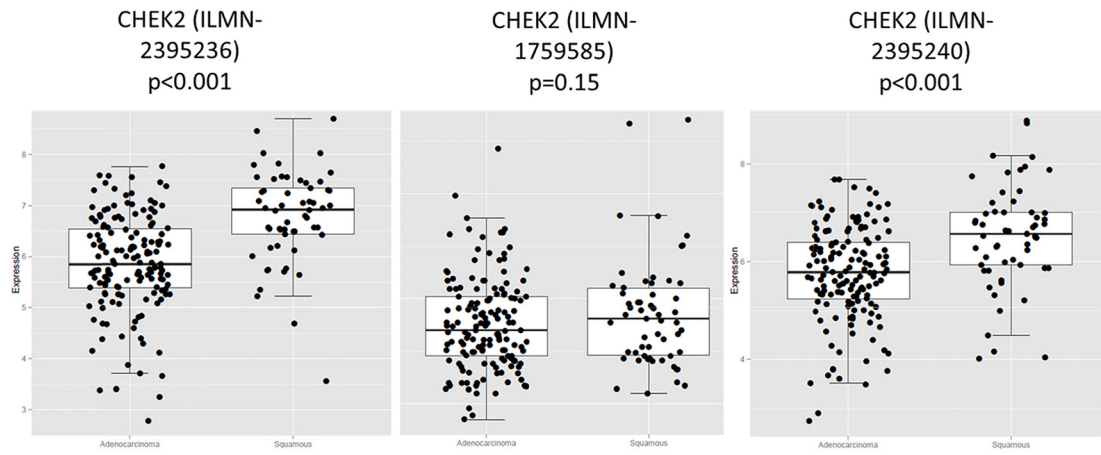

Supplementary Figure 4: Variations in *CHEK2* expression by histology with all probes used in this analysis.

NCOA3 (ILMN-  
2347693)  
p=0.014

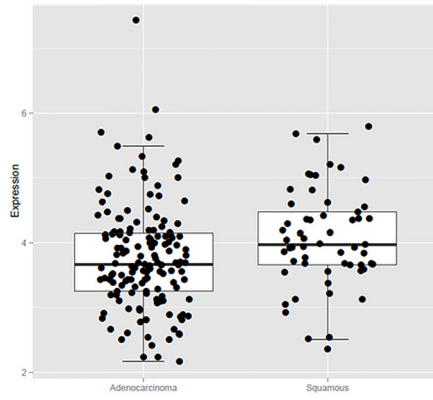

NCOA3 (ILMN-  
1708805)  
p=0.83

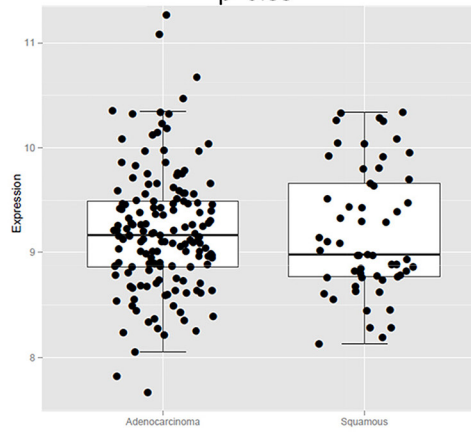

Supplementary Figure 5: Variations in *NCOA3* expression by histology with all probes used in this analysis.

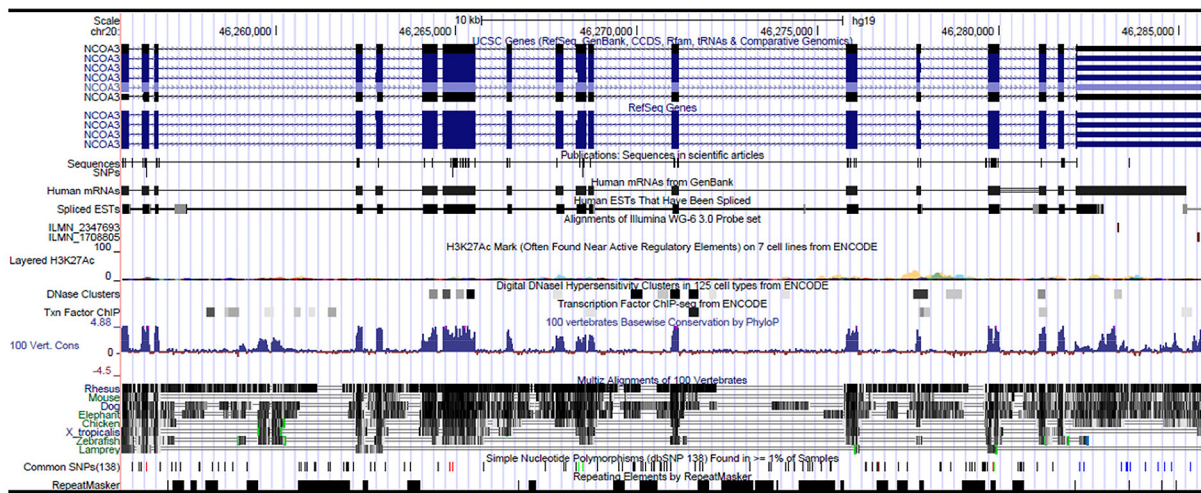

**Supplementary Figure 6: Genome browser utilized in gene expression analysis of NCOA3.** The gene for ILMN-2347693 demonstrated increased expression in SCC but was located in a non-spliced region.

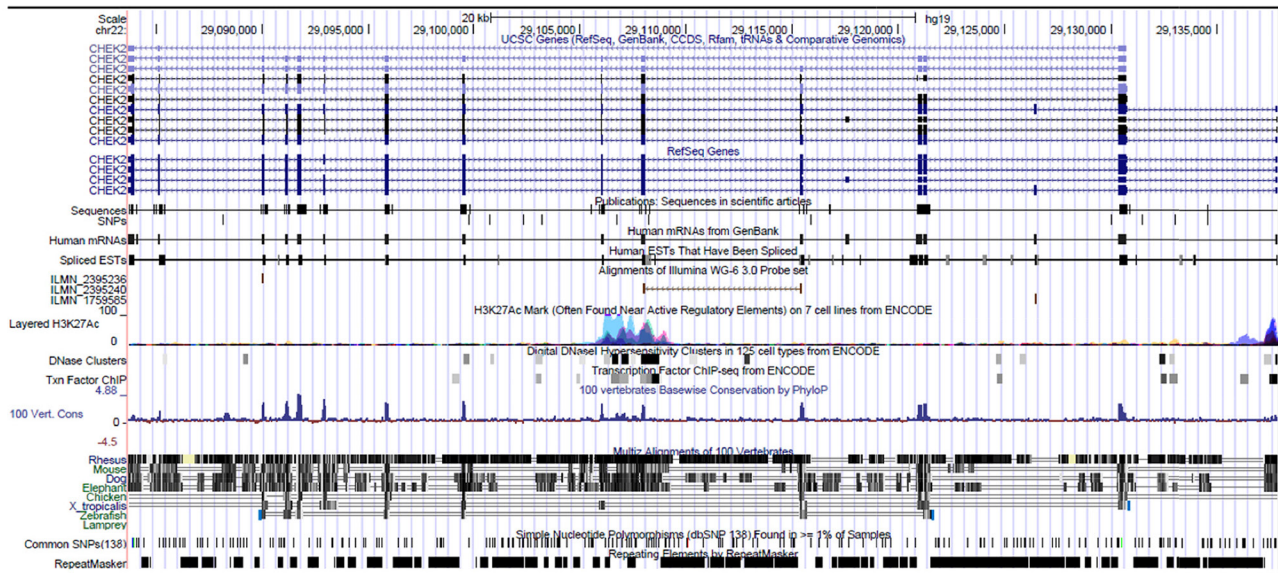

**Supplementary Figure 7: Genome browser utilized in gene expression analysis of CHEK2.** Two of the three probes demonstrated increased expression in SCC, and the gene for the probe that did not (ILMN-1759585) was located distant from the 3' region and is not preserved in other animals.

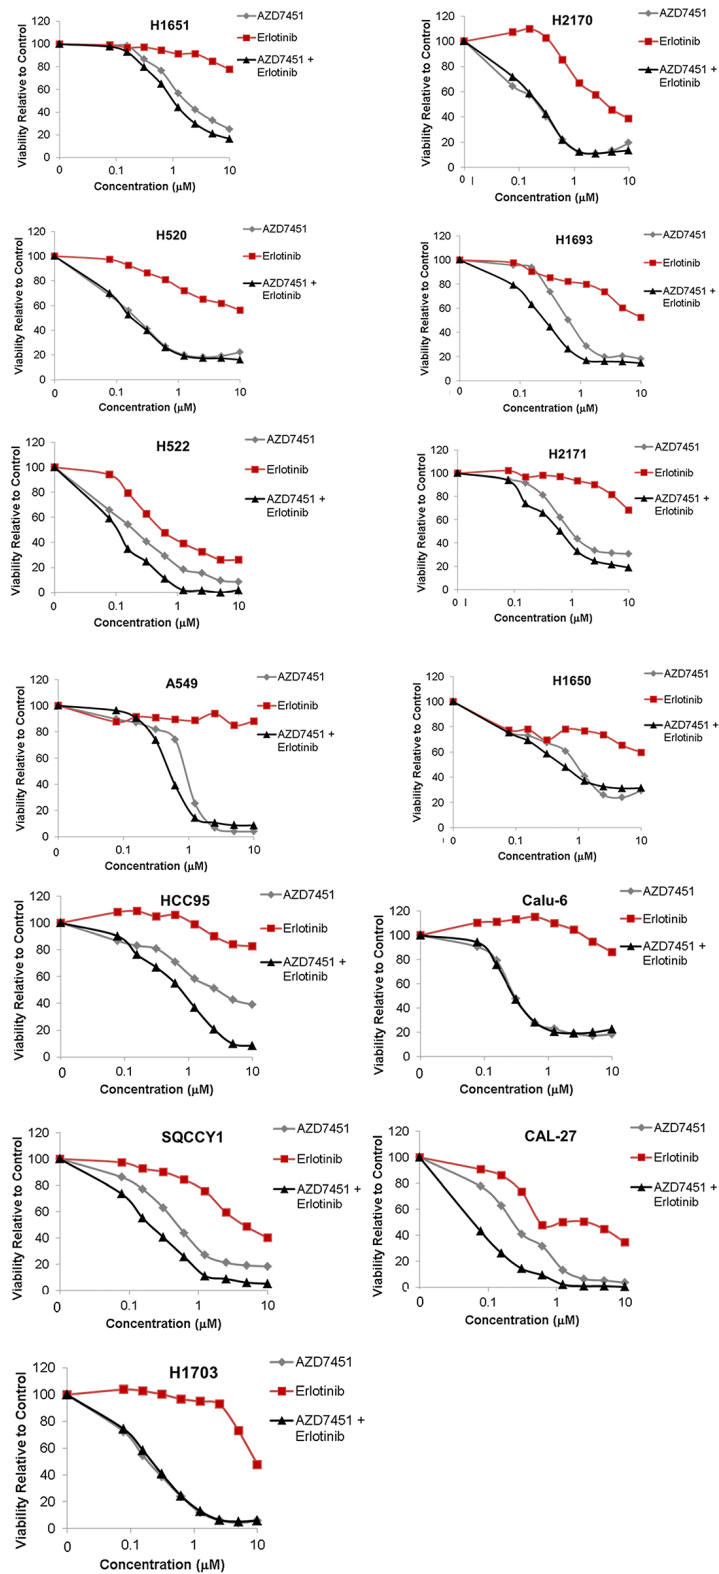

Supplementary Figure 8: Growth curves demonstrating inhibition with erlotinib, AZD7451, and combination therapy.



**Supplementary Table 1: Patient characteristics of datasets in study**

| <b>Characteristic</b>        | <b>PROSPECT<br/>n (%)<br/>(total n=140)</b> | <b>TCGA SCC<br/>n (%)<br/>(total n=195)</b> | <b>TCGA non-SCC<br/>n (%)<br/>(total n=181)</b> |
|------------------------------|---------------------------------------------|---------------------------------------------|-------------------------------------------------|
| Female                       | 59 (42)                                     | 40 (21)                                     | 105 (58)                                        |
| Male                         | 81 (58)                                     | 115 (59)                                    | 76 (42)                                         |
| Unknown                      | 0 (0)                                       | 40 (20)                                     | 0 (0)                                           |
| Squamous Cell Carcinoma      | 34 (24)                                     | 195 (100)                                   | 0 (0)                                           |
| Non-SCC*                     | 106 (76)                                    | 0 (0)                                       | 181 (100)                                       |
| Stage I                      | 78 (56)                                     | 80 (41)                                     | 95 (52)                                         |
| Stage II                     | 24 (18)                                     | 39 (20)                                     | 39 (22)                                         |
| Stage III                    | 36 (26)                                     | 33 (17)                                     | 40 (22)                                         |
| Stage IV                     | 1 (<1)                                      | 43 (22)                                     | 7 (4)                                           |
| Unknown                      | 0 (0)                                       |                                             |                                                 |
| Smoking                      |                                             |                                             |                                                 |
| No                           | 12 (9)                                      | 10 (5)                                      | 27 (15)                                         |
| Yes                          | 128 (91)                                    | 140 (72)                                    | 147 (81)                                        |
| Unknown                      | 0 (0)                                       | 45 (23)                                     | 7 (4)                                           |
| For adenocarcinoma patients, |                                             |                                             |                                                 |
| KRAS                         |                                             |                                             |                                                 |
| Mutant                       | 35 (33)                                     | N/A                                         | 36 (24)                                         |
| Non-Mutant                   | 71 (67)                                     |                                             | 134 (74)                                        |
| Unknown                      | 0 (0)                                       |                                             | 0 (0)                                           |
| For adenocarcinoma patients, |                                             |                                             |                                                 |
| EGFR                         |                                             |                                             |                                                 |
| Mutant                       | 12 (11)                                     | N/A                                         | 27 (15)                                         |
| Non-mutant                   | 94 (89)                                     |                                             | 154 (85)                                        |
| Unknown                      | 0 (0)                                       |                                             | 0 (0)                                           |

**Supplementary Table 2: Full list of proteins differentially expressed in SCC vs. non-SCC (listed by significance value)**

See Supplementary File 1

**Supplementary Table 3: Crosstalk between EGFR and TrkB inhibition in both SCC and adenocarcinoma cell lines, demonstrating synergy in all but one head and neck cell line, and two SCC cell lines**

| Cell Line                  | SCC vs. Adenocarcinoma | AZD7451 IC <sub>50</sub> (μm) | Erlotinib IC <sub>50</sub> (μm) | Chou Talalay Interaction Index (IAI) | Synergy/ Antagonism (IAI<1=Synergy, IAI>1=Antagonism) |
|----------------------------|------------------------|-------------------------------|---------------------------------|--------------------------------------|-------------------------------------------------------|
| H520                       | SCC                    | 0.19                          | 8.51                            | 1.01                                 | Additive                                              |
| H2170                      | SCC                    | 0.17                          | 5.88                            | 1.42                                 | Antagonism                                            |
| HCC95                      | SCC                    | 3.24                          | 7.8                             | 0.21                                 | Synergy                                               |
| H1703                      | SCC                    | 0.15                          | 5.2                             | 1.13                                 | Antagonism                                            |
| SQCCY1 (Head and Neck SCC) | SCC                    | 0.6                           | 4.86                            | 0.34                                 | Synergy                                               |
| Cal-27                     | SCC                    | 0.24                          | 2.6                             | 0.16                                 | Synergy                                               |
| H1693                      | Adenocarcinoma         | 0.7                           | 14.1                            | 0.27                                 | Synergy                                               |
| H522                       | Adenocarcinoma         | 0.17                          | 0.85                            | 0.48                                 | Synergy                                               |
| H2172                      | Adenocarcinoma         | 1.75                          | 24.9                            | 0.49                                 | Synergy                                               |
| H1651                      | Adenocarcinoma         | 2.33                          | >30                             | 0.59                                 | Synergy                                               |
| A549                       | Adenocarcinoma         | 0.6                           | >30                             | <0.01                                | Synergy                                               |
| Calu-6                     | Adenocarcinoma         | 0.5                           | 11.73                           | 1.04                                 | Additive                                              |
| H1650                      | Adenocarcinoma         | 0.85                          | >30                             | 0.84                                 | Synergy                                               |

Note that the two cell lines in which antagonism was observed were found to have strong effects with AZD7451 alone.
